# Supplementary material for: In situ synthesis of an ultrafine heterostructural Nb2O5–NbC polysulfide promotor for high-performance Li–S batteries
Source: Royal Society of Chemistry journal article supplement (doi:10.1039/d1ta05657c), 2021-01-01
Supplement: d1ta05657c1.pdf [file d1ta05657c1.pdf]

## Supporting Information

**Figure S1.** (a-c) Top view representations of  $\text{Li}_2\text{S}_4$  diffusion pathways on the  $\text{M-Nb}_2\text{O}_5$  (001) surface and (d) the corresponding energy profile.

**Figure S2.** Digital photos of the multilayer-folded (a) and bended  $\text{Nb}_2\text{O}_5\text{-NbC/CNF-PS}$  (b) sample.

**Figure S3.** SEM (a, b) and TEM (c) images of the pure CNF.

**Figure S4.** SEM images of the  $\text{Nb}_2\text{O}_5\text{-NbC/CNF}$ .

**Figure S5.** SEM images of the  $\text{Nb}_2\text{O}_5\text{-NbC/CNF-PS}$ .

**Figure S6.** XRD patterns. (a)  $\text{Nb}_2\text{O}_5\text{-NbC/CNF-PS}$  pyrolyzed at 900°C or 1000°C. (b)  $\text{Nb}_2\text{O}_5\text{-NbC/CNF}$  pyrolyzed at 900°C or 1000°C.

**Figure S7.** XPS of the  $\text{Nb}_2\text{O}_5\text{-NbC/CNF-PS}$  with or without PS.

**Figure S8** Pore size distribution plots of the typical  $\text{Nb}_2\text{O}_5\text{-NbC/CNF-PS}$  and  $\text{Nb}_2\text{O}_5\text{-NbC/CNF}$  without PS.

**Figure S9.** TG plot of the C/S composite.

**Figure S10.** SEM (a, b), TEM (c) images and XRD pattern of the  $\text{Nb}_2\text{O}_5\text{-NbC(L)/CNF-PS}$ .

**Figure S11.** Electrochemical performance of the Li-S batteries with  $\text{Nb}_2\text{O}_5\text{-NbC(L)/CNF-PS}$ . (a) Cycle stability, (b) Rate, and (c) The discharge-charge profiles.

**Figure S12.** Cycle stability of the Li-S batteries without an interlayer.

**Figure S13.** The discharge-charge profiles of the batteries with (a)  $\text{Nb}_2\text{O}_5\text{-NbC/CNF-PS}$  (b)  $\text{Nb}_2\text{O}_5\text{-NbC/CNF}$  and (c) CNF.

**Figure S14.** SEM images after 100 cycles: Sulfur cathode (a) without and (b) with the typical  $\text{Nb}_2\text{O}_5\text{-NbC/CNF-PS}$ , lithium anode (c) without and (d) with the typical  $\text{Nb}_2\text{O}_5\text{-NbC/CNF-PS}$ .

**Figure S15.** Electrochemical impedance spectroscopy (EIS) plots of Li-S batteries.

**Figure S16.** CV curves of Li-S cells at various scan rates. (a) with CNF interlayer (b) without interlayer.

**Figure S17.** CV curves of the symmetric cell employing  $\text{Nb}_2\text{O}_5\text{-NbC/CNF-PS}$  or CNF as electrode.

**Table S1.** The adsorption energy of the representative LiPSs on the optimized configurations of  $\text{Nb}_2\text{O}_5$  or NbC.

**Table S2.** Conductivity of different samples measured by the four-point probe method.

**Table S3.** Measured BET Surface Area, and the Pore Volume of different samples.

**Table S4.** The slope of the curve ( $I_p/v^{0.5}$ ).

**Table S5.** Lithium ion diffusion coefficients.

**Table S6.** Electrochemical performance of some representative recently-reported interlayer/modified separator containing heterostructures in the recently-reported literatures.

**Table S7.** Electrochemical performance of some representative recently-reported Nb-relative catalysis in the recently-reported literatures.

**Figure S1.** (a-c) Top view representations of  $\text{Li}_2\text{S}_4$  diffusion pathways on the  $\text{M-Nb}_2\text{O}_5$  (001) surface and (d) the corresponding energy profile.

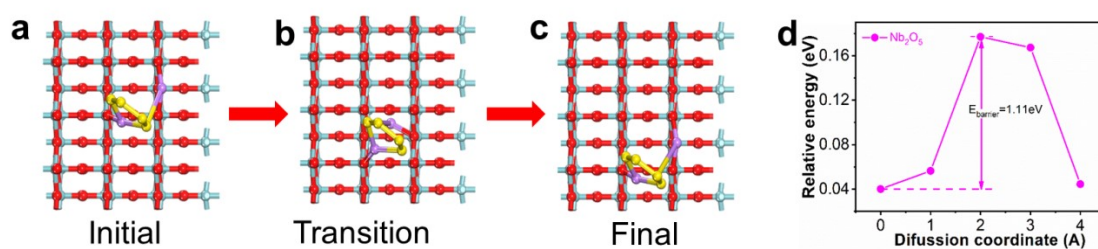

Note: The cyan, red, purple and yellow spheres represent Nb, O, Li, and S, respectively.

**Figure S2.** Digital photos of the typical  $\text{Nb}_2\text{O}_5\text{-NbC/CNF-PS}$ : (a) the multilayer-folded. (b) the bended.

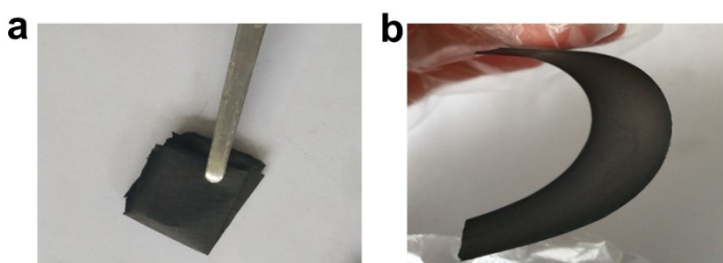

**Figure S3.** SEM (a, b) and TEM (c) images of the pure CNF.

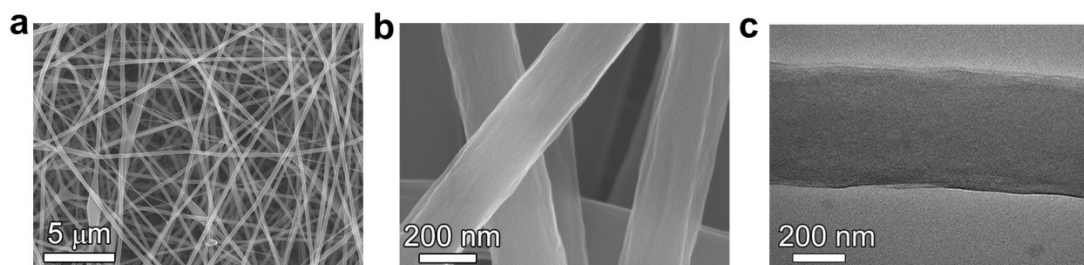

**Figure S4.** SEM images of the  $\text{Nb}_2\text{O}_5\text{-NbC/CNF}$ .

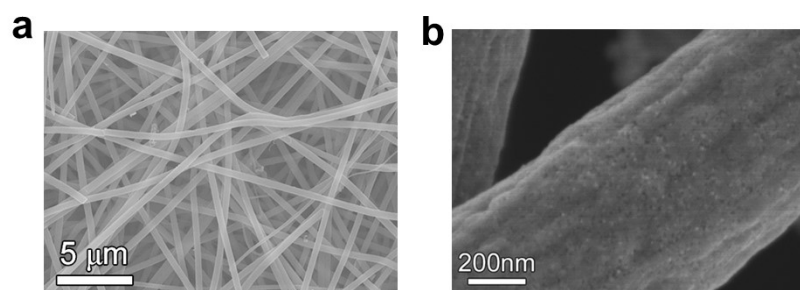

**Figure S5.** SEM images of the typical Nb<sub>2</sub>O<sub>5</sub>-NbC/CNF-PS.

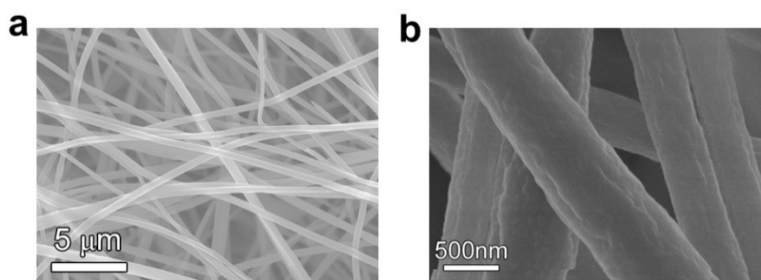

**Figure S6.** XRD patterns. (a) Nb<sub>2</sub>O<sub>5</sub>-NbC/CNF-PS pyrolyzed at 900°C or 1000°C. (b) Nb<sub>2</sub>O<sub>5</sub>-NbC/CNF pyrolyzed at 900°C or 1000°C.

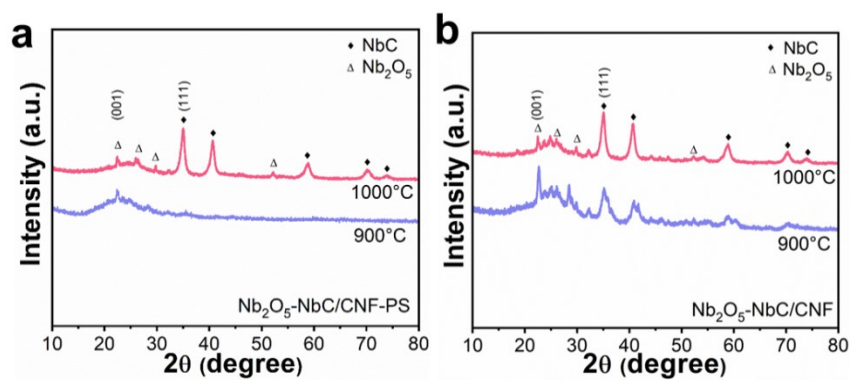

**Figure S7.** XPS of the typical Nb<sub>2</sub>O<sub>5</sub>-NbC/CNF-PS and Nb<sub>2</sub>O<sub>5</sub>-NbC/CNF without PS.

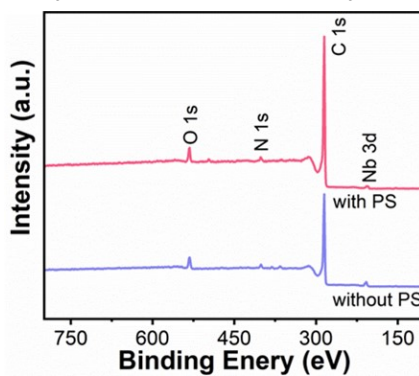

**Figure S8.** Pore size distribution plots of the typical Nb<sub>2</sub>O<sub>5</sub>-NbC/CNF-PS and Nb<sub>2</sub>O<sub>5</sub>-NbC/CNF without PS.

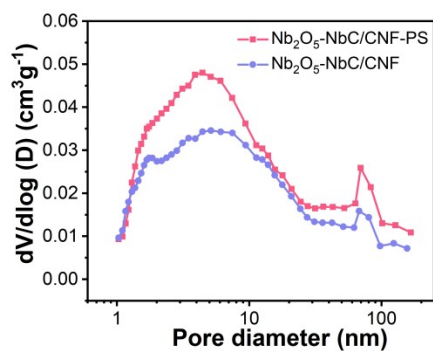

**Figure S9.** TG plot of the C/S composite.

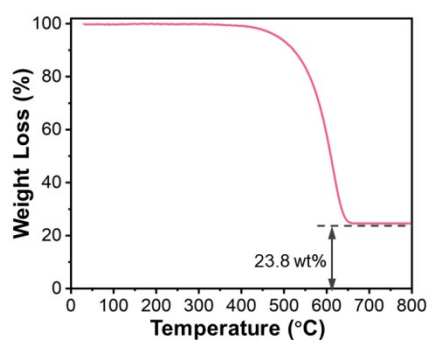

**Figure S10.** SEM (a, b), TEM (c) images and XRD pattern (d) of the Nb<sub>2</sub>O<sub>5</sub>-NbC(L)/CNF-PS.

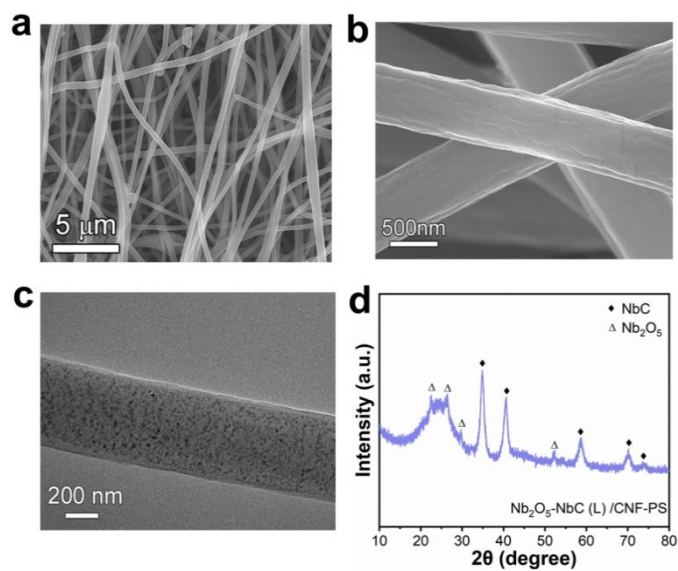

**Figure S11.** Electrochemical performance of the Li-S batteries with Nb<sub>2</sub>O<sub>5</sub>-NbC(L)/CNF-PS. (a) Cycle stability, (b)Rate, and (c)The discharge-charge profiles.

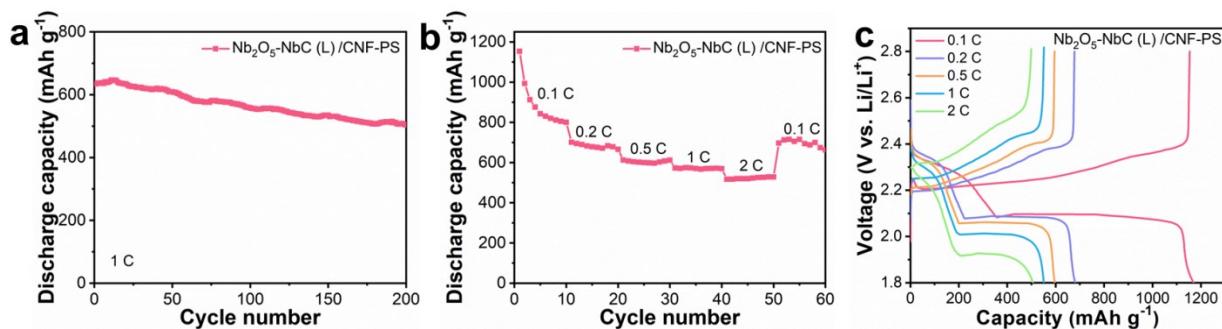

**Figure S12.** Cycle stability of the Li-S batteries without an interlayer.

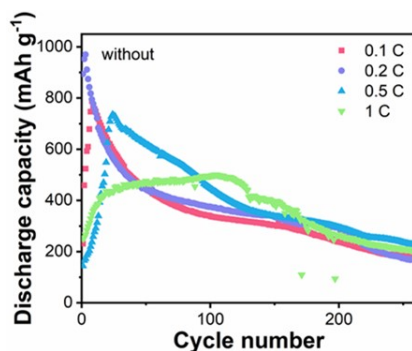

**Figure S13.** The discharge-charge profiles of the batteries with (a) the typical Nb<sub>2</sub>O<sub>5</sub>-NbC/CNF-PS (b) Nb<sub>2</sub>O<sub>5</sub>-NbC/CNF and (c) CNF.

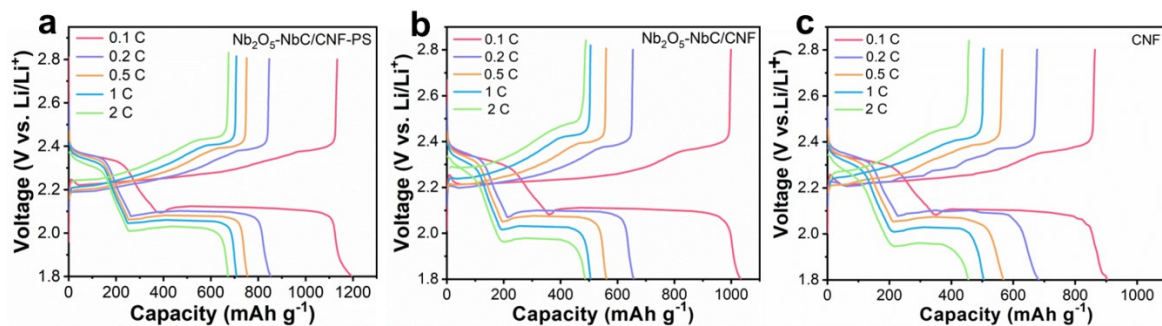



**Figure S14.** SEM images after 100 cycles: Sulfur cathode (a) without and (b) with the typical  $\text{Nb}_2\text{O}_5\text{-NbC/CNF-PS}$ , lithium anode (c) without and (d) with the typical  $\text{Nb}_2\text{O}_5\text{-NbC/CNF-PS}$ .

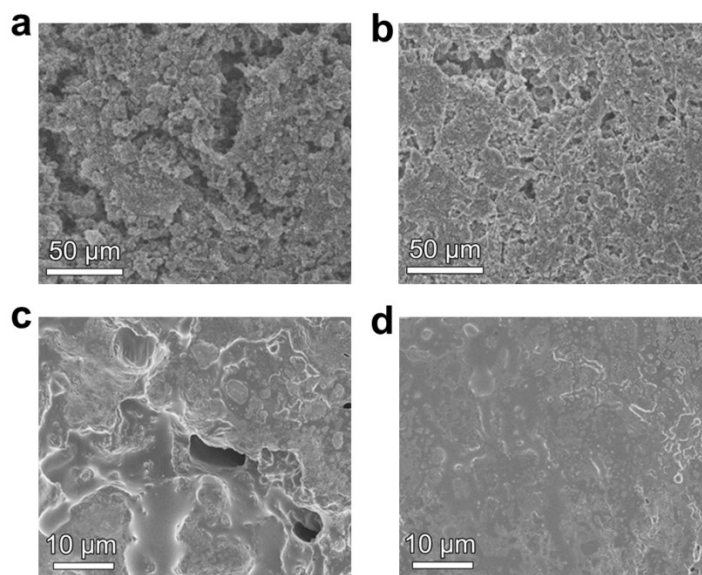

**Figure S15.** Electrochemical impedance spectroscopy (EIS) plots of Li-S batteries.

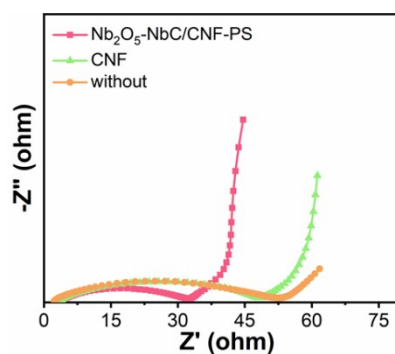

**Figure S16.** CV curves of Li-S batteries at various scan rates. (a) with CNF interlayer (b) without interlayer.

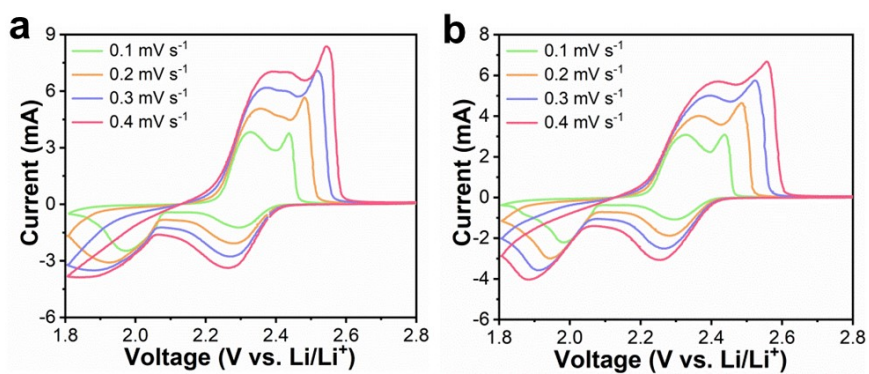

**Figure S17.** CV curves of the symmetric cell employing Nb<sub>2</sub>O<sub>5</sub>-NbC/CNF-PS or CNF as electrode.

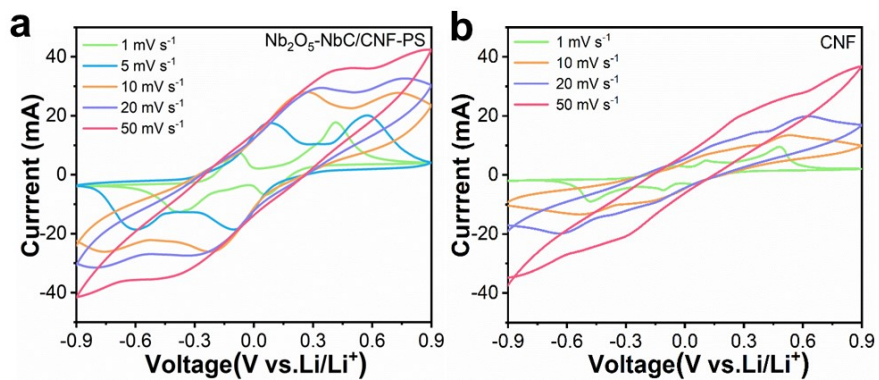

**Table S1.** The adsorption energy of the representative LiPSs on the optimized configurations of Nb<sub>2</sub>O<sub>5</sub> or NbC.

|                                   | Optimized configurations                                                            | E <sub>adsorption</sub> energy towards Li <sub>2</sub> S <sub>6</sub> (eV) | E <sub>adsorption</sub> energy towards Li <sub>2</sub> S <sub>4</sub> (eV) |
|-----------------------------------|-------------------------------------------------------------------------------------|----------------------------------------------------------------------------|----------------------------------------------------------------------------|
| Nb <sub>2</sub> O <sub>5</sub> -O | 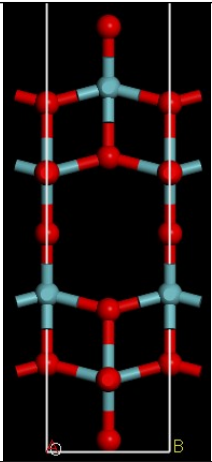  | -5.13                                                                      | -6.07                                                                      |
| NbC-C                             |  | -4.14                                                                      | -5.94                                                                      |

**Table S2.** Conductivity of different samples measured by the four-point probe method.

| Samples                            | Nb <sub>2</sub> O <sub>5</sub> -NbC/CNF-PS | CNF                   |
|------------------------------------|--------------------------------------------|-----------------------|
| Conductivity (S cm <sup>-1</sup> ) | 1.42×10 <sup>-2</sup>                      | 3.13×10 <sup>-3</sup> |

**Table S3.** Measured BET Surface Area, and the Pore Volume of different samples.

| Samples                                    | BET surface area (m <sup>2</sup> g <sup>-1</sup> ) | Micropore volume (cm <sup>3</sup> g <sup>-1</sup> ) | Mesopore volume (cm <sup>3</sup> g <sup>-1</sup> ) | Total pore volume (cm <sup>3</sup> g <sup>-1</sup> ) |
|--------------------------------------------|----------------------------------------------------|-----------------------------------------------------|----------------------------------------------------|------------------------------------------------------|
| Nb <sub>2</sub> O <sub>5</sub> -NbC/CNF-PS | 62.63                                              | 0.013                                               | 0.074                                              | 0.087                                                |
| Nb <sub>2</sub> O <sub>5</sub> -NbC/CNF    | 29.37                                              | 0.0098                                              | 0.045                                              | 0.055                                                |



**Table S4.** The slope of the curve ( $I_p/v^{0.5}$ ).

| Samples                                    | C1       | C2      |
|--------------------------------------------|----------|---------|
| Nb <sub>2</sub> O <sub>5</sub> -NbC/CNF-PS | 0.38177  | 0.25608 |
| CNF                                        | 0.18363  | 0.19771 |
| Without interlayer                         | 0.032485 | 0.13771 |

The Li ion diffusion constant can be estimated using the Randles-Sevcik equation[1]:

$$I_p = 2.69 \times 10^5 n^{3/2} A D_{Li}^{1/2} v^{1/2} C_{Li} \quad [1]$$

where  $I_p$  is the peak current,  $n$  represents electron number,  $A$  represents electrode area,  $D_{Li}$  is the Li ion diffusion coefficient,  $C_{Li}$  is the Li ion concentration in the electrochemical reaction,  $v$  is the scanning rate.

**Table S5.** Lithium ion diffusion coefficients.

| Samples                                    | $D_{Li^+}$ [cm <sup>2</sup> S <sup>-1</sup> ] |                               |
|--------------------------------------------|-----------------------------------------------|-------------------------------|
|                                            | C1 (cathode peak at 1.8-2.0V)                 | C2 (cathode peak at 2.1-2.4V) |
| Nb <sub>2</sub> O <sub>5</sub> -NbC/CNF-PS | 19.69×10 <sup>-8</sup>                        | 8.86×10 <sup>-8</sup>         |
| CNF                                        | 4.55×10 <sup>-8</sup>                         | 5.28×10 <sup>-8</sup>         |
| Without interlayer                         | 1.43×10 <sup>-9</sup>                         | 2.56×10 <sup>-8</sup>         |

**Table S6.** Electrochemical performance of some representative recently-reported heterostructures-containing interlayer/modified separator in the recently-reported literatures.

| Interlayer/<br>modified separator                  | Initial<br>capacity<br>(mAh g <sup>-1</sup> ) | Rate<br>(C) | Cycles | Capacity<br>Decay<br>(cycle <sup>-1</sup> ) | Cycling<br>performance<br>(mAh g <sup>-1</sup> ) | Sulfur<br>loading<br>(mg cm <sup>-2</sup> ) | Sulfur<br>cathode | Reference |
|----------------------------------------------------|-----------------------------------------------|-------------|--------|---------------------------------------------|--------------------------------------------------|---------------------------------------------|-------------------|-----------|
| Nb <sub>2</sub> O <sub>5</sub> -NbC/CNF-<br>PS     | 800                                           | 1           | 800    | 0.044%                                      | 508.5                                            | 1.2                                         | MC/S*             | This work |
|                                                    | 818                                           | 0.2         | 100    | —                                           | 776.4                                            | 3                                           |                   |           |
|                                                    | 752                                           | 0.5         | 250    | 0.045%                                      | 612                                              | 4                                           |                   |           |
| NbN/G<br>modified separator                        | 1079                                          | 1           | 300    | 0.096%                                      | 768                                              | 1-1.5                                       | Sulfur            | [2]       |
| NCM (NbC-<br>modified<br>separator)                | 1304                                          | 0.2         | 100    | 0.24%                                       | 988.4                                            | 2                                           | Sulfur            | [3]       |
|                                                    | 1082                                          | 2           | 1500   | 0.037%                                      | 500                                              |                                             |                   |           |
| MoP <sub>2</sub> /CNT<br>interlayer                | 1223                                          | 0.2         | 100    | 0.152%                                      | 905                                              | 1.2                                         | Sulfur            | [4]       |
|                                                    | 1035                                          | 0.2         | 500    | —                                           | 641                                              | 2.8                                         |                   |           |
|                                                    | 892                                           | 1           | 500    | 0.045%                                      | 392.8                                            |                                             |                   |           |
| MoO <sub>2</sub> -Mo <sub>2</sub> N-SP-<br>Celgard | 1083                                          | 1           | 500    | 0.028%                                      | 632.6                                            | 0.8-1                                       | CB/S              | [5]       |
|                                                    | 1152                                          | 0.1         | 100    | —                                           | 790                                              | 3.1                                         |                   |           |
|                                                    | 826                                           | 0.2         | 100    | 0.26%                                       | 590                                              | 4                                           |                   |           |
| SnO <sub>2</sub> NWs@CP<br>interlayer              | 900                                           | 0.2         | 100    | —                                           | 886                                              | 2.2                                         | Sulfur            | [6]       |
|                                                    | 883                                           | 0.2         | 100    | —                                           | 815                                              | 4                                           |                   |           |

|                                           |        |     |     |        |       |         |           |      |
|-------------------------------------------|--------|-----|-----|--------|-------|---------|-----------|------|
| Ni/SiO <sub>2</sub> /G-modified separator | 1282   | 0.2 | 100 | 0.28%  | 922   | 1-1.2   | —         | [7]  |
|                                           | 940    | 2   | 300 | 0.085% | 699   |         |           |      |
| ReS <sub>2</sub> @NG interlayer           | 854    | 2   | 800 | 0.064% | 854   | 1.4-1.6 | CNT/S     | [8]  |
|                                           | 796    | 1   | 500 | 0.036% | 398   | 3.27    |           |      |
| CoS <sub>2</sub> /HPGC interlayer         | 1055   | 0.2 | 250 | —      | 846   | 2.5-3   | Sulfur    | [9]  |
|                                           | 743    | 1   | 500 | 0.07%  | 519   |         |           |      |
| TiO <sub>2</sub> -TiN modified separator  | 1034   | 0.3 | 300 | 0.027% | 927   | 1.0-1.2 | MWCN Ts/S | [10] |
| TiO-TiO <sub>2</sub> /BNCNF interlayer    | 1014.7 | 0.5 | 400 | 0.092% | 637.2 | 2.5     | CMK-3-S   | [11] |
|                                           | 650    | 2   | 120 | —      | 598   |         |           |      |

\* MC: mesoporous carbon

**Table S7.** Electrochemical performance of some representative recently-reported Nb-relative catalysts in the recently-reported literatures.

| Host                                          | Initial capacity (mAh g <sup>-1</sup> ) | Rate (C)   | Cycles     | Capacity Decay (cycle <sup>-1</sup> ) | Cycling performance (mAh g <sup>-1</sup> ) | Sulfur loading (mg cm <sup>-2</sup> ) | Reference        |
|-----------------------------------------------|-----------------------------------------|------------|------------|---------------------------------------|--------------------------------------------|---------------------------------------|------------------|
| <b>Nb<sub>2</sub>O<sub>5</sub>-NbC/CNF-PS</b> | <b>800</b>                              | <b>1</b>   | <b>800</b> | <b>0.044%</b>                         | <b>508.5</b>                               | <b>1.2</b>                            | <b>This work</b> |
|                                               | <b>818</b>                              | <b>0.2</b> | <b>100</b> | —                                     | <b>776.4</b>                               | <b>3</b>                              |                  |
|                                               | <b>752</b>                              | <b>0.5</b> | <b>250</b> | <b>0.045%</b>                         | <b>612</b>                                 | <b>4</b>                              |                  |
| HCN@NbC/S                                     | 813                                     | 3          | 800        | 0.05%                                 | 500                                        | 1.5                                   | [12]             |
|                                               | 906                                     | 0.1        | 100        | 0.19%                                 | 730                                        | 3                                     |                  |
| S/NbN@NG                                      | 948                                     | 1          | 400        | 0.09%                                 | 592                                        | 2.4                                   | [13]             |
| Co-NbN/rGO/S                                  | 1103                                    | 0.2        | 150        | —                                     | 706.5                                      | 1.2-1.7                               | [14]             |
|                                               | 984                                     | 1          | 800        | 0.07%                                 | 404.5                                      |                                       |                  |
| MCM/Nb <sub>2</sub> O <sub>5</sub> /S         | 1289                                    | 0.5        | 200        | 0.14%                                 | 913                                        | 1.5                                   | [15]             |
|                                               | 1196                                    | 2          | 500        | —                                     | 650                                        |                                       |                  |
| NbS <sub>2</sub> @S@IG                        | 881                                     | 0.5        | 350        | 0.07%                                 | 856                                        | 1.05                                  | [16]             |
|                                               | 515                                     | 1          | 600        | —                                     | 405                                        | 3.25                                  |                  |
| S-A/T-Nb <sub>2</sub> O <sub>5</sub>          | 1279                                    | 0.1        | 100        | —                                     | 1006                                       | 1.5                                   | [17]             |
|                                               | 902                                     | 0.5        | 800        |                                       | 600                                        |                                       |                  |
| A-Nb <sub>2</sub> O <sub>5-x</sub> @MCS-S     | 902.5                                   | 0.2        | 500        | —                                     | 615                                        | 1                                     | [18]             |
|                                               | 1126                                    | 1          | 1200       | 0.024%                                | 746.3                                      |                                       |                  |

## References

- [1] H. Kim, J. Lee, H. Ahn, O. Kim, M.J. Park, Synthesis of three-dimensionally interconnected sulfur-rich polymers for cathode materials of high-rate lithium-sulfur batteries, *Nat. Commun.*, 6 (2015) 7278.
- [2] H.F. Shi, Z.H. Sun, W. Lv, S.J. Xiao, H.C. Yang, Y. Shi, K. Chen, S.G. Wang, B.S. Zhang, Q.H. Yang, F. Li, Efficient polysulfide blocker from conductive niobium nitride@graphene for Li-S batteries, *J. Electroanal. Chem.*, 45 (2020) 135-141.
- [3] W.L. Cai, G.R. Li, K.L. Zhang, G.N. Xiao, C. Wang, K.F. Ye, Z.W. Chen, Y.C. Zhu, Y.T. Qian, Conductive Nanocrystalline Niobium Carbide as High-Efficiency Polysulfides Tamer for Lithium-Sulfur Batteries, *Adv. Funct. Mater.*, 28 (2018) 1704865.
- [4] Y. Luo, N. Luo, W. Kong, H. Wu, K. Wang, S. Fan, W. Duan, J. Wang, Multifunctional Interlayer Based on Molybdenum Diphosphide Catalyst and Carbon Nanotube Film for Lithium-Sulfur Batteries, *Small*, 14 (2018) 1702853.
- [5] J.L. Yang, S.X. Zhao, Y.M. Lu, X.T. Zeng, W. Lv, G.Z. Cao, In-situ topochemical nitridation derivative  $\text{MoO}_2\text{-Mo}_2\text{N}$  binary nanobelts as multifunctional interlayer for fast-kinetic Li-Sulfur batteries, *Nano Energy*, 68 (2020) 104356.
- [6] H. Ahn, Y. Kim, J. Bae, Y.K. Kim, W.B. Kim, A multifunctional  $\text{SnO}_2$ -nanowires/carbon composite interlayer for high- performance lithium-sulfur batteries, *Chem. Eng. J.*, 401 (2020) 126042.
- [7] C. Chen, Q.B. Jiang, H.F. Xu, Y.P. Zhang, B.K. Zhang, Z.Y. Zhang, Z. Lin, S.Q. Zhang, Ni/SiO<sub>2</sub>/Graphene-modified separator as a multifunctional polysulfide barrier for advanced lithium-sulfur batteries, *Nano Energy*, 76 (2020) 105033.
- [8] N. Wei, J.S. Cai, R.C. Wang, M.L. Wang, W. Lv, H.N. Ci, J.Y. Sun, Z.F. Liu, Elevated polysulfide regulation by an ultralight all-CVD-built  $\text{ReS}_2$ @N-Doped graphene heterostructure interlayer for lithium-sulfur batteries, *Nano Energy*, 66 (2019) 104190.
- [9] Q. Hu, J. Lu, C. Yang, C. Zhang, J. Hu, S. Chang, H. Dong, C. Wu, Y. Hong, L. Zhang, Promoting Reversible Redox Kinetics by Separator Architectures Based on  $\text{CoS}_2$  /HPGC Interlayer as Efficient Polysulfide-Trapping Shield for Li-S Batteries, *Small*, 16 (2020) 2002046.
- [10] T.H. Zhou, W. Lv, J. Li, G.M. Zhou, Y. Zhao, S.X. Fan, B.L. Liu, B.H. Li, F.Y. Kang, Q.H. Yang, Twinborn  $\text{TiO}_2\text{-TiN}$  heterostructures enabling smooth trapping-diffusion-conversion of polysulfides towards ultralong life lithium-sulfur batteries, *Energy Environ. Sci.*, 10 (2017) 1694-1703.
- [11] J. Zhu, Y. Liu, L. Zhong, J. Wang, H. Chen, S. Zhao, Y. Qiu, Hybrid  $\text{TiO-TiO}_2$  nanoparticle/B-N co-doped CNFs interlayer for advanced Li S batteries, *J. Electroanal. Chem.*, 881 (2021) 114950.
- [12] Q.Q. Huang, M.Q. Chen, Z. Su, L.Y. Tian, Y.Y. Zhang, D.H. Long, Rational cooperativity of nanospace confinement and rapid catalysis via hollow carbon nanospheres@Nb-based inorganics for high-rate Li-S batteries, *Chem. Eng. J.*, 411 (2021) 128504.
- [13] X. Li, B. Gao, X. Huang, Z. Guo, Q. Li, X. Zhang, P.K. Chu, K. Huo, Conductive Mesoporous Niobium Nitride Microspheres/Nitrogen-Doped Graphene Hybrid with Efficient Polysulfide Anchoring and Catalytic Conversion for High-Performance Lithium-Sulfur Batteries, *ACS Appl. Mater. Interfaces*, 11 (2019) 2961-2969.
- [14] W.N. Ge, L. Wang, C.C. Li, C.S. Wang, D.B. Wang, Y.T. Qian, L.Q. Xu, Conductive cobalt doped niobium nitride porous spheres as an efficient polysulfide convertor for advanced lithium-sulfur batteries, *J. Mater. Chem. A*, 8 (2020) 6276-6282.

- [15] Y. Tao, Y. Wei, Y. Liu, J. Wang, W. Qiao, L. Ling, D. Long, Kinetically-enhanced polysulfide redox reactions by Nb<sub>2</sub>O<sub>5</sub>nanocrystals for high-rate lithium–sulfur battery, *Energy Environ. Sci.*, 9 (2016) 3230-3239.
- [16] Z. Xiao, Z. Yang, L. Zhang, H. Pan, R. Wang, Sandwich-Type NbS<sub>2</sub>@S@I-Doped Graphene for High-Sulfur-Loaded, Ultrahigh-Rate, and Long-Life Lithium-Sulfur Batteries, *ACS Nano*, 11 (2017) 8488-8498.
- [17] J.Y. Wang, G.R. Li, D. Luo, Y. Zhao, Y.G. Zhang, G.F. Zhou, L.L. Shui, X. Wang, Amorphous-crystalline-heterostructured niobium oxide as two-in-one host matrix for high-performance lithium-sulfur batteries, *J. Mater. Chem. A*, 9 (2021) 11160-11167.
- [18] D. Luo, Z. Zhang, G. Li, S. Cheng, S. Li, J. Li, R. Gao, M. Li, S. Sy, Y.P. Deng, Y. Jiang, Y. Zhu, H. Dou, Y. Hu, A. Yu, Z. Chen, Revealing the Rapid Electrocatalytic Behavior of Ultrafine Amorphous Defective Nb<sub>2</sub>O<sub>5-x</sub> Nanocluster toward Superior Li-S Performance, *ACS Nano*, 14 (2020) 4849-4860.
